1  
2  
3  
4  
5  
6  
7  
8  
9  
10  
11  
12  
13  
14  
15  
16  
17  
18  
19  
20  
21  
22  
23  
24  
25

## Injectable therapeutic organoids using sacrificial hydrogels

Ninna S. Rossen,<sup>1,2,3</sup>† Priya N. Anandakumaran,<sup>1</sup>† Rafael zur Nieden,<sup>1</sup>† Kahmun Lo,<sup>1</sup>  
Wenjie Luo,<sup>1</sup> Christian Park,<sup>1</sup> Chuqiao Huyan,<sup>1</sup> Qinyuouen Fu,<sup>1</sup> Ziwei Song,<sup>1</sup> Rajinder P.  
Singh-Moon,<sup>1</sup> Janice Chung,<sup>1</sup> Jennifer Goldenberg,<sup>1</sup> Nirali Sampat,<sup>1</sup> Tetsuhiro Harimoto,<sup>1</sup>  
Danielle Bajakian,<sup>4</sup> Brian M. Gillette,<sup>1</sup> and Samuel K. Sia<sup>1\*</sup>

<sup>1</sup>Department of Biomedical Engineering, Columbia University, 351 Engineering Terrace,  
1210 Amsterdam Avenue, New York, NY, USA 10027.

<sup>2</sup>Biotech Research & Innovation Centre, University of Copenhagen, University of  
Copenhagen, Ole Maaløes Vej 5, 2200 Copenhagen N, Denmark (Current affiliation)

<sup>3</sup>Department of Radiation Oncology, Stanford University, Palo Alto, CA, USA (Current  
affiliation)

<sup>4</sup>Department of Surgery - Division of Vascular Surgery and Endovascular Interventions,  
Columbia University Medical Center, Herbert Irving Pavilion, 161 Fort Washington Avenue,  
New York, NY, USA 10032.

† These authors made equal contributions.

\*Correspondence to be addressed to [ss2735@columbia.edu](mailto:ss2735@columbia.edu)

26 **Abstract**

27

28           Organoids, by promoting self-organization of cells into native-like structures, are  
29 becoming widespread in drug-screening technologies, but have so far been used sparingly for  
30 cell therapy as current approaches for producing self-organized cell clusters lack scalability  
31 or reproducibility in size and cellular organization. We introduce a method of using  
32 hydrogels as sacrificial scaffolds, which allow cells to form self-organized clusters followed  
33 by gentle release, resulting in highly reproducible multicellular structures on a large scale.  
34 We demonstrated this strategy for endothelial cells and mesenchymal stem cells to self-  
35 organize into blood-vessel units, which were injected into mice using hypodermic needles,  
36 and observed in real time to rapidly form perfusing vasculature. As cell therapy transforms  
37 into a new class of therapeutic modality, this simple method – by making use of the dynamic  
38 nature of hydrogels – could offer high yields of self-organized multicellular aggregates with  
39 reproducible sizes and cellular architectures.

40

41

## 42 **Introduction**

43

44           Organoids, such as vascularized organoids or spheroids<sup>1-3</sup>, are three-dimensional  
45 multicellular clusters which mimic the structure and function of native tissues and are useful  
46 for on-chip drug screening<sup>4,5</sup>. For use as a cell therapy, delivery of cells within well-  
47 controlled microenvironments, rather than suspensions of isolated cells, could promote and  
48 maintain desired cellular functions within dynamic and complex *in vivo* environments<sup>6-11</sup>.  
49 As organoids are increasingly being explored for *in vivo* studies and therapy, there is  
50 increasing recognition of the unmet challenge in generating multicellular aggregates with  
51 high reproducibility and control. As one example, even though control over “organoid size,  
52 shape, cellular composition and 3D architecture...is essential in order to understand the  
53 mechanisms that underlie organoid development in normal and pathological situations, and to  
54 use them as targets for manipulation or drug testing”, reproducibility has been cited as “the  
55 major bottleneck of current organoid systems”<sup>12</sup>.

56

57           The major current methods for generating organoids include spinner cultures<sup>13</sup>,  
58 hanging drops<sup>14,15</sup>, and non-adhesive 96-well plates<sup>16-19</sup> (Supplementary Table 1), but these  
59 methods are difficult to scale or harsh to cells. (Alternatively, microtissues that are “cells in  
60 gels”<sup>20-23</sup> typically feature cells moving to pre-formed pores within a hydrogel scaffold, but  
61 the cells are limited in their ability to self-organize into desired structures<sup>24</sup>, and the resultant  
62 gels exhibit variable structures and sizes dependent on the pores and may be undesired in the  
63 implanted site due to potential immunogenicity). More recently, methods to fabricate  
64 organoids based on micro-sized wells have faced challenges of either high adsorption (of  
65 steroid hormones, small molecules, and drugs<sup>25,26</sup> for PDMS-based wells) or inefficient and

66 harsh processes, usually involving vigorous pipetting or high-speed centrifugation, to  
67 separate and remove the cellular clusters from the microwells. Such procedures produce  
68 cellular clusters at a low yield and could damage cellular structures and function.  
69 Recognizing this limitation, other studies have proposed more complex methods to actively  
70 release cellular clusters from microwells<sup>27-29</sup>. As such, there still lacks reliable methods to  
71 generate organoids at high yield and with reproducibility and control over aggregate size and  
72 cellular organization.

73

74 Many hydrogels are biocompatible and have been used as a dynamically responsive  
75 biomaterial (such as microfluidic valve<sup>30</sup>, changing cellular microenvironment<sup>31</sup>, and  
76 stimuli-responsive drug release<sup>32</sup>). We hypothesize that a dynamic change in the cross-  
77 linking state of hydrogels could gently release organoids, and sought to demonstrate the  
78 strategy for producing large numbers of vascularized organoids with high reproducibility and  
79 scalability, as well as the ability to retain functionality after passing through needles to  
80 obviate invasive surgery<sup>33,34</sup>. We also assessed the ability of the pre-formed blood-vessel  
81 units, after injection, to rapidly integrate with the host's vascular network in a healthy mouse  
82 model.

83

## 84 **Results**

85

### 86 **Hydrogels as a sacrificial scaffold as a gentle and scalable method for producing and** 87 **harvesting organoids**

88

89 Sacrificial materials are widely used in micromachining of microelectromechanical  
90 systems (MEMS) to release patterned metals or semiconductors from a substrate (Figure 1a).

91 To cellular structures, some hydrogels (such as agarose or poly(ethylene)glycol as previously  
92 demonstrated) can be non-adhesive and thereby promote cells to interact with one another  
93 and contract into microtissues and organoids<sup>1,35</sup>. We hypothesized that a dynamic change in  
94 the cross-linking state of alginate, which can be achieved by adding calcium or a chelator and  
95 has been demonstrated for other purposes<sup>31,36</sup>, could similarly release cell-based structures  
96 from a surface without significantly disrupting the organoid structures or underlying cell  
97 function<sup>37,38</sup>. Specifically, we deposit the sacrificial material, create the sacrificial structure  
98 by cross-linking the alginate in its patterned state, deposit cells on top to allow cellular self-  
99 organization to take place, and remove the sacrificial layer by adding a chelator (5% w/v  
100 sodium citrate) (Fig. 1a; see Supplementary Figure 1 for fabrication details). The alginate is  
101 uncrosslinked within ~12 minutes (Fig. 1b), to gently release a large number of organoids  
102 floating in solution (Fig. 1c,d; Supplementary Video 1). The resulting organoid solution  
103 could be gently pipetted into tubes, centrifuged and resuspended in a culture medium suitable  
104 for downstream manipulation or direct cell delivery. Each step is simple, can be conducted  
105 with sterile liquid handling, and can be automated.

106

107         The step of cellular self-organization can be adjusted depending on the organoid of  
108 interest. For vascularized organoids (Fig. 1c), we seeded a co-culture containing ECs and  
109 MSCs (of either mouse or human origin) into the dissolvable alginate microwells. We  
110 cultured the cells in media without growth factors (“maintenance” medium), followed by a  
111 vasculogenic medium with growth factors to induce cell-cell interactions including sprouting  
112 of blood vessel-like structures. The organoids, now containing blood vessel-like structures,  
113 contract and are gently released by dissolving the alginate microwells.

114

115           The same small number of steps (Fig. 1c, d) can harvest a large number of organoids  
116 by using alginate templates with large numbers of microwells. As an example, we  
117 demonstrated three different sizes of alginate microwell inserts for culture dishes (Fig. 2a):  
118 15.6 mm-diameter inserts containing >1000 microwells (yielding >24,000 organoids on a 24-  
119 well plate), 22.1-mm inserts containing >3000 microwells (yielding >36,000 organoids on a  
120 12-well plate), and a 60-mm diameter insert containing >30,000 microwells in a 60-mm  
121 culture dish. If desired, the inserts can be stacked to increase the number of organoids  
122 produced in the same area with additional media changes.

123

124           We demonstrated this massive parallel production of more than 30,000 organoids by  
125 seeding a quarter of a billion cells (Fig. 2b) in one 60-mm dish insert (Fig. 2c). We also  
126 tested the ability of the organoids to assemble *in vitro* into a microvascular network (Fig. 2d).  
127 We co-cultured RFP-labelled MSCs and GFP-labelled ECs for four days, gently harvested  
128 the organoids, and assembled them into a macroscopic tissue with surface area of 1 cm<sup>2</sup> and a  
129 height of 1 mm (Fig. 2d). We performed fluorescence imaging of this macroscopic tissue  
130 (Fig. 2e). The organoids were densely packed, and exhibited distinct endothelial core  
131 structures, confirming that the gentle harvest and assembly did not disturb the internal  
132 architecture of the organoids. The assembled macrotissue, consisting of fully contracted  
133 organoids, did not visibly contract during subsequent *in vitro* culture.

134

### 135 **Production of organoids with reproducible size and structure**

136

137           Next, we studied whether the sizes and internal architectures of organoids could be  
138 controlled reproducibly. In the absence of exogenous growth factors, we observed that GFP-  
139 labelled human umbilical vein endothelial cells (HUVECs), which were initially randomly

140 distributed alongside RFP-labelled mouse MSCs, migrate to the center of the organoids and  
141 form endothelial cores after culture in the “maintenance” medium for 3 days (Fig. 3a, top  
142 panel, and Supplementary Video 2). Similarly, ECs also formed endothelial cores when co-  
143 cultured with another cell type (fibroblasts) in a medium without growth factors  
144 (Supplementary Figure 2), the endothelial cores were more pronounced than in a previous  
145 observation<sup>19</sup>. By contrast, ECs did not migrate to the center when the organoids were  
146 initially cultured in a vasculogenic medium containing 50 ng/mL VEGF and 50 ng/mL bFGF  
147 (Fig. 3a, bottom panel), consistent with a previous observation<sup>9</sup>. Overall, the data showed  
148 the organoids to exhibit reproducible internal architectures containing endothelial cores.

149

150 We characterized the reproducibility of the method in controlling the size of the pre-  
151 vascularized organoid. By varying the microwell sizes and the co-culture ratios of cell types  
152 (Fig. 3b), we controlled the number of cells that could aggregate into a single organoid. For  
153 example, microwells of three different sizes (100, 200, and 400  $\mu\text{m}$  diameter) yielded  
154 organoids of three different sizes ( $39\pm 3$   $\mu\text{m}$ ,  $71\pm 5$   $\mu\text{m}$ , and  $82\pm 7$   $\mu\text{m}$  diameter, respectively,  
155 all at the same cell-seeding concentration) (Fig. 3b). The well size was chosen to be large  
156 enough to hold all the cells at the initial seeding concentration, but small enough to ensure  
157 sufficient cell-cell contact to form a single organoid rather than multiple organoids. The cells  
158 aggregated into compact organoids within the first two days of *in vitro* culture, as seen by the  
159 decreasing radius of the smallest circle to include all cells (Fig. 3c), with the main contraction  
160 happening in the first day and no further contraction after three days. We also observed that  
161 the size of the fully contracted organoids (at day 2 and after) correlated to the number of cells  
162 in the organoid as expected; the diameter of the organoids’ cross sections related to the  
163 number of cells in the organoid and the cells typical volume as  $r_{\text{organoid}} = (6/\pi v_{\text{cell}} n_{\text{cell}})^{1/3}/2$   
164 (Supplementary Figure 3).

165

166           Also, we quantitatively analyzed the formation of organoids for cultures containing  
167 only MSCs, and co-cultures with EC:MSC ratios of 1:3, 1:1, and 3:1 (Fig. 3b-e). In 200- $\mu$ m  
168 microwells, over three days, cells contracted into an organoid and ECs migrated towards the  
169 center (Fig. 3c), and co-cultures in 400  $\mu$ m microwells showed similar trends in organoid  
170 contraction and EC migration (Supplementary Figure 4). Co-cultures in 100- $\mu$ m microwells,  
171 however, did not contain enough cells (fewer than 150 cells in total) to form a distinct center  
172 (Supplementary Figure 5). We also observed that the organoids per unit area and the number  
173 of organoids containing defined internal architectures could be controlled by varying  
174 microwell sizes and ratios of cell types (Fig. 3e). (In subsequent *in vivo* studies, we have  
175 used 200- $\mu$ m microwells with ratios of MSC only, 1 EC:3 MSC and 1 EC:1 MSC, as these  
176 conditions showed aggregation involving almost all the cells within the microwells.) Overall,  
177 the data showed the method can produce organoids with internal architectures at high  
178 throughput and different sizes controllably.

179

## 180 **Production of pre-vascularized human organoids with reproducible size and structure**

181

182           We examined the effectiveness of this method for producing pre-vascularized  
183 organoids containing human adipose-derived MSCs (hAMSCs) with human umbilical vein  
184 endothelial cells (HUVECs), in ratios of MSCs only, 1 EC:3 MSC, and 1 EC:1 MSC. We  
185 examined the maturation of organoids over 8 days, where organoids were first grown in  
186 maintenance medium over 3 days to form endothelial cores, and then switched to  
187 vasculogenic medium containing exogenous growth factors for 5 days (Fig. 4a). By day 8,  
188 vessel-like structures, such as lumens within the center of the organoid, with sprouting and  
189 maturation of vessels towards the surface were observed (especially evident in the larger



190 organoids of the 400- $\mu\text{m}$  wells). The initial migration of ECs was apparent after 20 hours  
191 (Fig. 4b and Supplementary Figure 6). In addition, we placed multiple pre-vascularized  
192 organoids inside 400  $\mu\text{m}$  alginate wells that were collagen-doped, to mimic the adhesiveness  
193 of native tissues. Within 24 hours, organoids attached to each other and contracted to form a  
194 larger, compact mesotissue (aggregation of multiple organoids) with a smooth outer border  
195 (Fig. 4c, with additional time points in Supplementary Figure 7 and Supplementary Video 3).  
196 Hence, this method produced organoids containing human ECs and MSCs, with control over  
197 sizes and spatial architectures, and confirming the ability to form a pre-vascularized  
198 mesotissue.

199

## 200 **Rapid host perfusion of pre-vascularized organoids in mouse model**

201

202       Next, we assessed the effectiveness of the prevascularized organoids to self-organize  
203 to form a vascular network, anastomose to native host vasculature, and be perfused with host  
204 blood in a mouse model (Fig. 5a). To facilitate real-time visualization, we performed surgery  
205 to place a window chamber (Supplementary Figure 8) to permit brightfield, epifluorescence  
206 and confocal imaging. We used organoids formed in 200- $\mu\text{m}$  wells yielding organoids  
207 approximately 70  $\mu\text{m}$  in diameter, which is also within the diffusion limit of oxygen<sup>39</sup>. We  
208 produced and harvested pre-vascularized organoids made of human cells (HUVECs and  
209 hAMSCs), which we injected into SCID mice, a well-established animal model for studying  
210 integration of xenografts made of human cells<sup>40</sup>. We could inject and monitor the vascular  
211 formation for multiple different conditions (e.g. 1 HUVEC : 1 hAMSC and hAMSC only) in  
212 the same mouse, by utilizing the strong bond between the fascia and the subdermis. We  
213 injected the organoids through the fascia and into the space between the fascia and the  
214 subdermis, leaving the subcutaneous tissue intact between injection sites to create a barrier

215 (Fig. 5b). The organoids held up intact to the shear stress of injection through a syringe and  
216 needle (Supplementary Figure 9). Interestingly, the shell of MSCs shielded the central blood-  
217 vessel building block against shear, and preserved the organoids' architectural integrity after  
218 they passed through the needle. (We also demonstrated the organoids could be injected  
219 directly into adipose tissue (Supplementary Figure 10) with good integration.)

220

221 We followed the formation of new vasculature by taking epifluorescent and  
222 stereoscopic images through the window chamber. Stereoscopic imaging (for example, of  
223 the 1 HUVEC : 1 hAMSC conditions) showed vessel formation between day 4 and 7 (Fig.  
224 5b, top rows), with the implanted vasculature connected to the host vasculature and becoming  
225 perfused (Fig. 5b, top rows). After just 7 days, host perfusion of the implanted vasculature  
226 was prominent and intense. The vessels were functional for the remaining 16 days of the 23-  
227 day *in vivo* studies. Quantitatively, we measured the total length of perfused vasculature in  
228 three regions-of-interest (ROIs) within the area of injected organoids (Fig. 5c). At day 7,  
229 areas injected with pre-vascularized organoids showed significant formation of new perfused  
230 vasculature, while areas injected with organoids consisting of MSCs only showed no increase  
231 in perfused vasculature (Figs. 5b bottom row and 5c). For all four mice tested (each with  
232 multiple conditions in the window chamber), all conditions with EC-containing organoids  
233 showed rapid vascularization of the injected organoids.

234

235 We also explored whether this self-organizing, "micro-to-macro" strategy could  
236 provide a limited but reproducible level of architectural control in the overall branching  
237 length of implanted, perfused microvasculature. Specifically, we hypothesized that average  
238 distances between endothelial cores could be related to diameters of organoids. The mean  
239 length of the perfused branches for 1 EC:1 MSC at day 7 was  $93\pm 39$   $\mu\text{m}$ , with minimal

240 changes by day 9 to 11, when the mean branch length was  $86\pm 29$   $\mu\text{m}$  and  $93\pm 44$   $\mu\text{m}$ ,  
241 respectively (Fig. 5d). Indeed, the length of the newly formed vasculature's branches  
242 reflected core-to-core distances between the densely packed, injected organoids with  
243 diameters of  $71\pm 5$   $\mu\text{m}$ .

244

245 We also used epifluorescence and confocal microscopy to characterize the formation  
246 and integration of the new vasculature. Observing the GFP-labeled HUVECs through the  
247 window chamber (Fig. 5e), we noticed the endothelial cores connecting with each other over  
248 time: the ECs initially appeared as discrete cores (day 0), then sprouted toward neighboring  
249 cores (day 4), connected with the host vasculature and became perfused (day 7), and  
250 stabilized as the perfused vascular network matured (day 9, 12, and 23). Between days 4 and  
251 7, the network matured to form lumens (Fig. 5e, red arrows). (We further confirmed the  
252 lumenous structure of the newly-formed, perfused network on day 11 via confocal  
253 microscopy on day 11, Supplementary Video 4.) Moreover, we observed that areas  
254 indicating newly formed lumens (consisting of GFP-labelled HUVECs) co-localized with  
255 areas indicating host blood perfusion, further confirming that it was the newly-formed  
256 lumenous vasculature that was perfused, rather than angiogenesis from the host into the  
257 implanted tissue.

258

## 259 **Discussion**

260

261 *Using sacrificial hydrogels to produce organoids with high reproducibility and*  
262 *scalability.* Like the development of micromachining techniques for producing MEMS  
263 structures reproducibly and on a large scale, we have developed a technique to use sacrificial  
264 hydrogels to produce clusters of self-organized cell-based structures with high reproducibility

265 and scalability. Previously, we and other groups have shown the use of microfabricated  
266 hydrogels, including sacrificial techniques, to form *in vitro* microvascular networks<sup>31,37,41,42</sup>.  
267 This paper demonstrated the dynamic structure of hydrogels can also be exploited to produce  
268 and gently release organoids for cell therapy.

269

270 For purposes of cell therapy, it is critical for clinical efficacy, process control, and  
271 regulatory approval that cells introduced into the body are generated via tightly controlled  
272 processes and exhibit reproducible origin, size, and structure. Previous studies have observed  
273 that a “lack of control over the process is likely to underpin the variability in systems and  
274 experiments that, with few exceptions, does not allow [organoids] to yield their full  
275 potential”, and the importance of achieving reproducible “organoid size, shape, cellular  
276 composition and 3D architecture” in future research on organoids as well as use for  
277 therapeutic purposes<sup>12</sup>. Compared to current organoid systems, our method can generate  
278 self-organized multicellular aggregates with both high yield (Supplementary Table 1) and  
279 high reproducibility over aggregate size and cellular organization (Supplementary Table 2).  
280 Moreover, the aggregate size and features of cellular organization can be tuned  
281 (Supplementary Table 2), as our method bears similarities to MEMS fabrication technologies  
282 (in contrast to “cells in gels” systems which feature a distribution of pore sizes). In this  
283 study, sizes and internal architectures of the organoids were reproducible for different types  
284 of cells (MSCs and ECs of mouse and human origin), cell ratios, and overall size of  
285 microwells which determined the diameter of the contracted organoids. Even at the tissue  
286 level both *in vitro* and *in vivo*, branching lengths of the vascular network were reproducible  
287 (by contrast, microtissues with ECs had previously yielded non-uniform branching lengths  
288 <sup>7,16,43</sup>.)

289

290           Also, an ideal method for generating organoids should be scalable and gentle. In the  
291 common hanging-drop method, 384 organoids could be produced in the area of an overall  
292 standard well plate (with the overall scalability limited by the number of wells<sup>14</sup>), whereas  
293 the smallest construct shown in Fig. 2 produces 24,000 organoids in the same area with fewer  
294 steps needed (e.g. media-changing steps, one alginate dissolving step), all of which could be  
295 automated by liquid handling. The release of organoids is gentle even at a large scale, in  
296 contrast to vigorous pipetting or high-speed centrifugation for current microwell procedures.  
297 For cell therapy, it is important that the integrity of the cells be preserved (for example, a  
298 FDA guidance document points to the need “to preserve integrity and function so that the  
299 products will work as they are intended”<sup>44</sup>. Beyond cell therapy, large-scale and effective  
300 production of organoids (beyond the quarter billion cells demonstrated) could also support  
301 studies in developmental biology, cancer cell intravasation<sup>16</sup>, and organ printing.

302

303           *An advanced, controlled form of cell therapy.* In past studies, needle injection (and  
304 organ printing) with unilaminar vascular organoids<sup>45,46</sup> had been challenging due to shear  
305 stress formation. It would be advantageous in cell therapy to be able to deliver the cells via  
306 minimally invasive injection rather than invasive surgery. Our method produced organoids  
307 which held up intact to shear stress during injections, even with high (25 to 30)-gauge  
308 needles (Supplementary Figure 9). This behavior may partially have been due to a shell of  
309 MSCs which protected the endothelial structure; interestingly, previous studies have also  
310 shown that the MSCs could act as an immune-suppressive shield for cell therapy in addition  
311 to providing angiogenic signaling<sup>47,48</sup>.

312

313           A potential application of these organoids is to treat peripheral artery disease, the  
314 most severe form of which is critical limb ischemia (CLI) which can lead to amputations<sup>49</sup>.

315 To date, over 50 cell-therapy trials are at clinical stages for treating CLI. Many trials involve  
316 injecting MSCs<sup>49-53</sup> or ECs (such as MarrowStim)<sup>52,54,55</sup>, but the cells could die from  
317 deprivation of oxygen and nutrients before they are able to assemble into vascular networks  
318 *in vivo* and anastomose with host vasculature. The use of therapeutic pre-vascularized  
319 organoids could overcome many of the issues associated with currently cell therapy trials in  
320 clinical trials to treat CLI. In a clinical scenario, such an approach could be especially  
321 attractive for “no-option” patients on the verge of amputation with subsequently poor  
322 mortality outcomes (60% within five years of surgery<sup>49</sup>).

323

## 324 **MATERIALS AND METHODS**

325

### 326 **Experimental design**

327           The objective of this study was to develop an approach to form self-organized  
328 organoids in a scalable and gentle manner, for use as an injectable cell therapy. As  
329 such, we designed dissolvable alginate microwells to culture organoids, promote self-  
330 organization of the cells, and gently harvest the organoids. We then demonstrated their  
331 functionality in a healthy mouse model using a window chamber assay. All cells used  
332 in these studies were purchased commercially, all animal procedures were approved by  
333 the Columbia University Institutional Animal Care and Use Committee (IACUC) and  
334 all experiments were performed in accordance with relevant guidelines/regulations.

335

### 336 **Fabrication of alginate microwells**

337           We developed an experimental setup to culture cellular organoids with high  
338 throughput and without the labor-intensive hanging drop approach. We seed the cells onto an  
339 alginate construct with between 379 and 30,000 microwells. The cells will settle into these  
340 microwells, and as the alginate provides no adherence structure for the cells, the cells will  
341 adhere strongly to each other forming spherical cell aggregates over the initial 24 hours.

342           The alginate microwells are cast on hydrophilic PDMS molds. We fabricated master  
343 molds in SU-8 (SU-8 3050, Microchem, Newton, MA) on 3-inch Si wafers (Silicon Sense,  
344 Nashua, NH) by photolithography as described before<sup>38</sup> to cast polydimethylsiloxane  
345 (PDMS, Sylgard 184, Essex Brownell, Fort Wayne, IN) replicas from the masters. We then  
346 made the PDMS molds hydrophilic by plasma treatment, and submerged them in distilled  
347 water to retain their hydrophilicity. We then autoclaved the PDMS molds prior to casting  
348 alginate.

349 We then prepared and autoclaved a 2% w/v alginate (Pronova UltraPure MVG,  
350 NovaMatrix, Drammen, Norway) or 7.5% w/v alginate (Alginic acid sodium salt, Millipore  
351 Sigma, St Louis, MO) in HEPES saline buffer solution (Ultrasaline A, Lonza, Basel,  
352 Switzerland). The alginate was pipetted into the PDMS molds. We used positive-  
353 displacement pipettes for accurate pipetting of viscous alginate solutions and to avoid  
354 bubbles. We closed the top of the molds with cellulose dialysis membranes (6000 Da  
355 MWCO), and flattened the membranes using the edge of a sterile glass slide. A 60 mM CaCl<sub>2</sub>  
356 HEPES buffer solution was pipetted on top of the membrane for at least 60 min to crosslink  
357 the alginate at room temperature. We removed the hydrogels from the molds using sterilized  
358 tools, and placed the hydrogels in HEPES saline buffer solution (Ultrasaline A, Lonza, Basel,  
359 Switzerland) supplemented with 1.8 mM CaCl<sub>2</sub> (to prevent leaching of the calcium ions from  
360 the hydrogels). We then transferred the alginate hydrogels into sterile culture ware, such as  
361 24-well plates (Fisher Scientific, Fair Lawn, NJ) with the open micro wells facing up and  
362 stored them at 4°C until further use.

363

#### 364 **Uncrosslinking of sacrificial alginate**

365 To determine the length of time required to uncrosslink the microwells, 7.5% w/v  
366 alginate microwells were fabricated as described in the previous section, and stored in 1.8mM  
367 CaCl<sub>2</sub> overnight. The following day, the alginate microwell scaffolds were transferred to  
368 preweighed, individually cut wells (from a 24 well plate), any excess CaCl<sub>2</sub> was removed,  
369 and the initial mass of the alginate scaffolds was measured. We then added 1 mL of PBS,  
370 0.5% w/v sodium citrate, or 5% w/v sodium citrate to the well, and after 1 minute the excess  
371 supernatant was removed, the remaining alginate scaffold was weighed, and a fresh solution  
372 of PBS, 0.5% sodium citrate or 5% sodium citrate was added. This was repeated until the  
373 alginate microwell scaffold was fully uncrosslinked (by the sodium citrate).



374

375 **Cell sources**

376 GFP-labeled human umbilical vein endothelial cells (GFP-hUVECs)  
377 (Angioproteomie, MA, USA) were cultured in Endothelial Growth Medium 2 (PromoCell,  
378 Heidelberg, Germany). Adipose derived human mesenchymal stem cells (hAMSCs)  
379 (Promocell, Heidelberg, Germany) were cultured in Mesenchymal Stem Cell Growth  
380 Medium (Promocell, Heidelberg, Germany). RFP-labeled mouse mesenchymal stem cells  
381 (RFP-mMSCs) (Cyagen, CA, USA) were cultured in DMEM with 10% FBS and 1%  
382 PenStrep (all from LifeTechnologies). All cells were gently passaged at 80-90% confluency  
383 using TrypLE (LifeTechnologies) and used only until passage P6 and mMSC until P8. Cells  
384 were cultured in 37°C and 5% CO<sub>2</sub>-balanced, humidified atmosphere.

385

386 **Fabrication of organoids**

387 HUVECs and MSCs were harvested from 2D cell culture, counted and desired cell  
388 ratios of HUVECs to MSCs were prepared: MSC only, 1 HUVEC to 3 MSC, 1 HUVEC to 1  
389 MSC and 3 HUVEC to 1 MSC.

390 Then the 1.8 mM CaCl<sub>2</sub> solution that the alginate microwells were stored in was  
391 removed, and replaced with DMEM (ATCC, Manassas, VA). The microwells were then  
392 placed in the incubator at 37°C and 5% CO<sub>2</sub> to equilibrate for at least 20 minutes. Then  
393 DMEM was removed and the microwell constructs gently dried using surgical spears  
394 (Braintree Scientific, Braintree, MA) leaving the microwell features covered.

395 Cell suspensions were then pipetted on to alginate molds of 100, 200 and 400 μm  
396 microwell size using a positive displacement pipette. Cells were left to settle to the bottom of  
397 the microwells for 20 minutes and the culture wells were then filled up with culture medium.

398

### 399 **Culture media**

400 The first 3-4 days after seeding, the cells were cultured in maintenance medium:

401 Dulbecco's Modified Eagle Medium (DMEM) with 10% Fetal Bovine Serum (FBS) and 1%

402 PenStrep (all from LifeTechnologies), with 50 µg/mL Sodium L-ascorbate (Sigma-Aldrich).

403 For Fig. 4 and 5, the maintenance medium also included 20 mM Hepes (Fisher Scientific,

404 Fair Lawn, NJ), 1 µM Insulin (LifeTechnologies, Carlsbad, CA), 250 nM T3, 1 µM

405 dexamethasone, 0.5 mM IBMX, 50 µM Indomethacine, 1 µM Rosiglitazone and 1 µM

406 CL316243 (all from Sigma, St. Louis, MO). After the first 3-4 days, the media was changed

407 from maintenance medium to vasculogenic medium: Dulbecco's Modified Eagle Medium

408 (DMEM) with 10% Fetal Bovine Serum (FBS) and 1% PenStrep (all from

409 LifeTechnologies), with 50 µg/mL Sodium L-ascorbate (Sigma-Aldrich), 40 ng/mL bFGF

410 and 40 ng/mL VEGF recombinant human protein (both from LifeTechnologies). For Fig. 4

411 and 5, the vasculogenic media also included 20 mM Hepes, 1 µM Insulin, and 250 nM T3.

412 The cells were cultured in vasculogenic medium up to day 11. Cell media was changed every

413 other day.

414

### 415 **Harvesting of organoids**

416 To collect organoids, the alginate hydrogel was uncrosslinked<sup>37</sup>. For this, the culture

417 medium of the organoids was replaced with 5%w/v sodium citrate solution for approximately

418 20 min. This chelator liquefied the alginate, and allowed for resuspension of the organoids in

419 a desired medium. Organoids were then centrifuged at 300 rpm for 5 minutes or as specified

420 and the organoid pellet carefully collected for further use.

421

### 422 **Organoid fusion**

423 To test the ability of organoids to assemble *in vitro* and fuse to a larger tissue, 200  $\mu\text{m}$   
424 sized organoids of only hAMSCs, 1 EC : 3 hAMSC and 1 EC : 1 hAMSC ratio were placed  
425 in a 400  $\mu\text{m}$  sized microwell of collagen-doped alginate<sup>38</sup> composed of 3.5% collagen and  
426 1% alginate. These organoids had previously been prevascularized as described above.  
427 Organoid fusion was conducted in vasculogenic medium and observed for 24 hours.

428

#### 429 **Formation of macro-tissue**

430 To yield a large enough number of organoids in parallel to produce a macroscopic  
431 tissue, we seeded a co-culture of 1 MSC : 1 EC ratio onto an alginate microwell construct  
432 that fits into a 60 mm culture dish and produces over 30,000 organoids (Fig. 2a and c). The  
433 cells were cultured in maintenance medium without growth factors for 4 days with daily  
434 media change due to the high number of cells. The organoids were collected by removing the  
435 medium and uncrosslinking the alginate with 5 mL 5%w/v sodium citrate solution. The  
436 alginate liquefied and the organoid solution was gently collected, spun down and resuspended  
437 in 1 mL vasculogenic media. To facilitate sustained culture and imaging of the macro-tissue,  
438 we had constructed a 1  $\text{cm}^2$  cylindrical hole in a 1 cm thick 10% agarose layer in the middle  
439 of a 60 mm dish. The hole was made by placing a 1  $\text{cm}^2$  by 1 cm PDMS mold in the middle,  
440 pouring on agarose and removing the PDMS cylinder when the agarose had gelled. The 1 mL  
441 organoid suspension was pipetted into the hole, allowed to settle for 1 hour, and then had 5  
442 mL vasculogenic media added on top. The media was changed daily.

443

#### 444 **Window chamber surgery**

445 Organoids were collected as described above. The suspension was gently spun down at  
446 220 g for 5 minutes. The supernatant was removed and the organoids resuspended in 200  $\mu\text{l}$   
447 PBS. *In vitro* created, prevascularized and non-prevascularized organoids were implanted in a

448 window chamber to allow for continuous in vivo monitoring of the vascularization and  
449 integration process. Window chamber surgeries were conducted as described previously<sup>56,57</sup>.  
450 A titanium window chamber (APJ Trading, Ventura, CA) was surgically implanted midline on  
451 the dorsum of male SCID mice (strain: ICRSC-M-M, 5-6 weeks of age, Taconic, Hudson, NY)  
452 after hair removal and ethanol and iodine disinfection.

453 To reduce variability between mice, prevascularized and non-prevascularized  
454 organoids were implanted in individual compartments of the same window chamber.  
455 Organoids were delivered by injection and pipetting underneath the fascia of connective  
456 tissue to the subcutaneous adipose tissue. Window chambers were closed with a circular glass  
457 cover slip and a retaining ring (APJ Trading, Ventura, CA). A custom-made 3D printed  
458 window chamber backing was attached to reduce skin movement in the window chamber. In  
459 a subset of experiments, a custom-made ultem plastic 9 well array was screwed onto the front  
460 frame of the window chamber to allow for high throughput in vivo testing. Here, organoids  
461 were placed into one of the 9 wells.

462 Animals were housed aseptically in frog cages to allow for enough clearance for the  
463 window chamber while still permitting easy access to standard laboratory chow (Irradiated  
464 globe rodent diet, Fisher Scientific, Fair Lawn, NJ) and drinking water ad libitum. Follow up  
465 buprenorphine administration (0.1mg/kg bodyweight) for pain management was given  
466 subcutaneously every 6-12 hours after surgery for the next 2 days post-OP. CO<sub>2</sub> euthanasia  
467 and cervical dislocation were performed after 30 days or earlier if necessary.

468 The animal procedures were approved and carried out in accordance to local  
469 regulations and authorities. The surgeries were conducted in aseptic technique.

## 470 **Imaging**

471 A Leica DMI 6000B inverted microscope with 4x and 10x objectives, equipped with  
472 a motorized stage (Leica Microsystems, Bannockburn, IL) and a QImaging Retiga 2000R

473 monochrome camera (QImaging, Surrey BC, Canada) was used to acquire fluorescence and  
474 brightfield images. Leica LAS X software was used for image acquisition. Cropping, color  
475 adjustments and contrast enhancements of images as well as Z-stack projections were  
476 performed in ImageJ. For time lapse imaging of organoid formation and organoid fusion an  
477 environmental chamber was used to maintain 37°C and 5% CO<sub>2</sub>. Images were acquired  
478 every 30min. Confocal images of the window chamber were taken using a Leica SP5  
479 confocal system with a 10.0x 0.30 N.A. objective. To be able to image the window chamber  
480 mice were anesthetized with isoflurane. Due to the stressfulness of the anesthesia of the  
481 imaging procedure, in vivo images were acquired every 2-3 days.

482         To precisely observe individual organoids, we took stacks of confocal images  
483 (1024x1024 pixels, 41 images with a z- spacing of 0.25 microns) using a Leica SP5 confocal  
484 microscope, with a 100x 1.43 N.A. oil immersion objective (Leica Microsystems) at a  
485 resolution of 0.132 µm/pixel (image stacks were thus 135 mm \* 135 mm \* 10 mm). We  
486 simultaneously collected the differential interference contrast (DIC) images as well as the  
487 RFP- and GFP-signal.

488

489

490

491

492

493

494 **Acknowledgements:** We acknowledge technical assistance by Yaas Bigdeli and Ayse  
495 Karakecili, and Mohammed Shaik and Elizabeth Hillman for help with imaging.

496

497 **Funding:** We acknowledge funding from NIH R01HL095477-05R01. N.S.R. was  
498 supported by a fellowship from the Villum Foundation and Novo Nordisk Foundation  
499 Visiting Scholar Fellowship at Stanford Bio-X (NNF15OC0015218. R.z.N. was  
500 supported by the German National Academic Foundation, the Gerhard C. Starck  
501 Foundation and the Klee Family Foundation.

502

503 **Author contributions:** N.S.R., R.z.N., B.M.G., and S.K.S. conceived the project and  
504 designed the experiments. N.S.R., P.N.A., R.z.N., K.L., W.L., C.P., C.H., Q.F., Z.S.,  
505 R.P.S.-M., J.C., J.E.G., N.S., T.H. and B.M.G. conducted the experiments and analyses.  
506 N.S.R., P.N.A., R.z.N. and B.M.G. analyzed and interpreted the data. N.S.R., P.N.A.  
507 and R.z.N. prepared the figures, and N.S.R., R.z.N., and S.K.S. wrote the manuscript  
508 with contributions from P.N.A. and B.M.G.. N.S.R., B.M.G., P.N.A. and S.K.S.  
509 supervised the project. All authors have reviewed the manuscript.

510

511 **Competing interests:** A patent has been filed by Columbia University on the technology  
512 described in this study.

513 **References**

- 514 1 De Moor, L. *et al.* High-throughput fabrication of vascularized spheroids for  
515 bioprinting. *Biofabrication* **10**, 035009 (2018).
- 516 2 Wimmer, R. A. *et al.* Human blood vessel organoids as a model of diabetic  
517 vasculopathy. *Nature* **565**, 505-510 (2019).
- 518 3 McGuigan, A. P. & Sefton, M. V. Vascularized organoid engineered by modular  
519 assembly enables blood perfusion. *Proceedings of the National Academy of Sciences*  
520 **103**, 11461-11466 (2006).
- 521 4 Alajati, A. *et al.* Spheroid-based engineering of a human vasculature in mice. *Nat.*  
522 *Methods* **5**, 439-445, doi:10.1038/nmeth.1198 (2008).
- 523 5 Nam, K. H., Smith, A. S., Lone, S., Kwon, S. & Kim, D. H. Biomimetic 3D Tissue Models  
524 for Advanced High-Throughput Drug Screening. *Journal of Laboratory Automation*  
525 **20**, 201-215, doi:10.1177/2211068214557813 (2015).
- 526 6 Takebe, T. *et al.* Vascularized and functional human liver from an iPSC-derived  
527 organ bud transplant. *Nature* **499**, 481-484, doi:10.1038/nature12271 (2013).
- 528 7 Walser, R. *et al.* Generation of co-culture spheroids as vascularisation units for  
529 bone tissue engineering. *European cells & materials* **26**, 222-233 (2013).
- 530 8 Yap, K. K. *et al.* Enhanced liver progenitor cell survival and differentiation in vivo  
531 by spheroid implantation in a vascularized tissue engineering chamber.  
532 *Biomaterials* **34**, 3992-4001, doi:10.1016/j.biomaterials.2013.02.011 (2013).
- 533 9 Dissanayaka, W. L., Zhu, L., Hargreaves, K. M., Jin, L. & Zhang, C. Scaffold-free  
534 Prevascularized Microtissue Spheroids for Pulp Regeneration. *J. Dent. Res.* **93**,  
535 1296-1303, doi:10.1177/0022034514550040 (2014).
- 536 10 Verseijden, F. *et al.* Prevascular structures promote vascularization in engineered  
537 human adipose tissue constructs upon implantation. *Cell Transplant.* **19**, 1007-  
538 1020, doi:10.3727/096368910X492571 (2010).
- 539 11 Meyer, U. *et al.* Cartilage defect regeneration by ex vivo engineered autologous  
540 microtissue--preliminary results. *In Vivo* **26**, 251-257 (2012).
- 541 12 Huch, M., Knoblich, J. A., Lutolf, M. P. & Martinez-Arias, A. The hope and the hype  
542 of organoid research. *Development* **144**, 938-941 (2017).
- 543 13 Sutherland, R. M., McCredie, J. A. & Inch, W. R. Growth of multicell spheroids in  
544 tissue culture as a model of nodular carcinomas. *J. Natl. Cancer Inst.* **46**, 113-120  
545 (1971).
- 546 14 Tung, Y. C. *et al.* High-throughput 3D spheroid culture and drug testing using a 384  
547 hanging drop array. *Analyst* **136**, 473-478, doi:10.1039/c0an00609b (2011).
- 548 15 Frey, O., Misun, P. M., Fluri, D. A., Hengstler, J. G. & Hierlemann, A. Reconfigurable  
549 microfluidic hanging drop network for multi-tissue interaction and analysis.  
550 *Nature Communications* **5**, 4250, doi:10.1038/ncomms5250 (2014).
- 551 16 Ehsan, S. M., Welch-Reardon, K. M., Waterman, M. L., Hughes, C. C. & George, S. C. A  
552 three-dimensional in vitro model of tumor cell intravasation. *Integr. Biol. (Camb.)*  
553 **6**, 603-610, doi:10.1039/c3ib40170g (2014).
- 554 17 Yuhas, J. M., Li, A. P., Martinez, A. O. & Ladman, A. J. A simplified method for  
555 production and growth of multicellular tumor spheroids. *Cancer Res.* **37**, 3639-  
556 3643 (1977).
- 557 18 Metzger, W. *et al.* The liquid overlay technique is the key to formation of co-culture  
558 spheroids consisting of primary osteoblasts, fibroblasts and endothelial cells.  
559 *Cytotherapy* **13**, 1000-1012, doi:10.3109/14653249.2011.583233 (2011).

- 560 19 Wenger, A. *et al.* Development and characterization of a spheroidal coculture  
561 model of endothelial cells and fibroblasts for improving angiogenesis in tissue  
562 engineering. *Cells Tissues Organs* **181**, 80-88, doi:10.1159/000091097 (2005).
- 563 20 Chung, H. J. & Park, T. G. Injectable cellular aggregates prepared from  
564 biodegradable porous microspheres for adipose tissue engineering. *Tissue*  
565 *Engineering Part A* **15**, 1391-1400, doi:10.1089/ten.tea.2008.0344 (2009).
- 566 21 Griffin, D. R., Weaver, W. M., Scumpia, P. O., Di Carlo, D. & Segura, T. Accelerated  
567 wound healing by injectable microporous gel scaffolds assembled from annealed  
568 building blocks. *Nat. Mat.* **14**, 737-744, doi:10.1038/nmat4294 (2015).
- 569 22 Huebsch, N. *et al.* Matrix elasticity of void-forming hydrogels controls  
570 transplanted-stem-cell-mediated bone formation. *Nat. Mat.* **14**, 1269-1277,  
571 doi:10.1038/nmat4407 (2015).
- 572 23 Li, Y. *et al.* Primed 3D injectable microniches enabling low-dosage cell therapy for  
573 critical limb ischemia. *Proceedings of the National Academy of Sciences* **111**,  
574 13511-13516 (2014).
- 575 24 Ovsianikov, A., Khademhosseini, A. & Mironov, V. The synergy of scaffold-based  
576 and scaffold-free tissue engineering strategies. *Trends Biotechnol.* **36**, 348-357  
577 (2018).
- 578 25 Li, N., Schwartz, M. & Ionescu-Zanetti, C. PDMS Compound Adsorption in Context.  
579 *J. Biomol. Screen.* **14**, 194-202, doi:10.1177/1087057106286653 (2009).
- 580 26 Toepke, M. W. & Beebe, D. J. PDMS absorption of small molecules and  
581 consequences in microfluidic applications. *Lab on a Chip* **6**, 1484-1486,  
582 doi:10.1039/b612140c (2006).
- 583 27 Shimizu, K. *et al.* Poly (N-isopropylacrylamide)-coated microwell arrays for  
584 construction and recovery of multicellular spheroids. *J. Biosci. Bioeng.* **115**, 695-  
585 699 (2013).
- 586 28 Tekin, H. *et al.* Stimuli-responsive microwells for formation and retrieval of cell  
587 aggregates. *Lab on a chip* **10**, 2411-2418 (2010).
- 588 29 Anada, T. *et al.* Three-dimensional cell culture device utilizing thin membrane  
589 deformation by decompression. *Sensors Actuators B: Chem.* **147**, 376-379 (2010).
- 590 30 Beebe, D. J. *et al.* Functional hydrogel structures for autonomous flow control  
591 inside microfluidic channels. *Nature* **404**, 588 (2000).
- 592 31 Gillette, B. M., Jensen, J. A., Wang, M., Tchao, J. & Sia, S. K. Dynamic hydrogels:  
593 switching of 3D microenvironments using two - component naturally derived  
594 extracellular matrices. *Adv. Mater.* **22**, 686-691 (2010).
- 595 32 Zhao, X. *et al.* Active scaffolds for on-demand drug and cell delivery. *Proceedings*  
596 *of the National Academy of Sciences* **108**, 67-72 (2011).
- 597 33 Kusamori, K. *et al.* Transplantation of insulin-secreting multicellular spheroids for  
598 the treatment of type 1 diabetes in mice. *J. Control. Release* **173**, 119-124 (2014).
- 599 34 Lee, J., Sato, M., Kim, H. & Mochida, J. Transplantation of scaffold-free spheroids  
600 composed of synovium-derived cells and chondrocytes for the treatment of  
601 cartilage defects of the knee. *European Cells & Materials* **22**, 90 (2011).
- 602 35 Lee, J. M. *et al.* Generation of uniform-sized multicellular tumor spheroids using  
603 hydrogel microwells for advanced drug screening. *Sci. Rep.* **8**, 17145 (2018).
- 604 36 X Chen, Y., Cain, B. & Soman, P. Gelatin methacrylate-alginate hydrogel with  
605 tunable viscoelastic properties. *AIMS Materials Science* **4** (2017).
- 606 37 Gillette, B. M. *et al.* In situ collagen assembly for integrating microfabricated three-  
607 dimensional cell-seeded matrices. *Nat. Mat.* **7**, 636-640, doi:10.1038/nmat2203  
608 (2008).



- 609 38 Gillette, B. M. *et al.* Engineering extracellular matrix structure in 3D multiphase  
610 tissues. *Biomaterials* **32**, 8067-8076, doi:10.1016/j.biomaterials.2011.05.043  
611 (2011).
- 612 39 Lovett, M., Lee, K., Edwards, A. & Kaplan, D. L. Vascularization strategies for tissue  
613 engineering. *Tissue engineering. Part B, Reviews* **15**, 353-370,  
614 doi:10.1089/ten.teb.2009.0085 (2009).
- 615 40 Steffens, L., Wenger, A., Stark, G. B. & Finkenzeller, G. In vivo engineering of a  
616 human vasculature for bone tissue engineering applications. *J. Cell. Mol. Med.* **13**,  
617 3380-3386, doi:10.1111/j.1582-4934.2008.00418.x (2009).
- 618 41 Miller, J. S. *et al.* Rapid casting of patterned vascular networks for perfusable  
619 engineered three-dimensional tissues. *Nat. Mat.* **11**, 768 (2012).
- 620 42 Bertassoni, L. E. *et al.* Hydrogel bioprinted microchannel networks for  
621 vascularization of tissue engineering constructs. *Lab on a Chip* **14**, 2202-2211  
622 (2014).
- 623 43 Rouwkema, J. D. B., J.; Van Blitterswijk, C. A. Endothelial Cells Assemble into a 3-  
624 Dimensional Prevascular Network in a Bone Tissue Engineering Construct. *Tissue*  
625 *Eng.* **12**, 2685-2693 (2006).
- 626 44 Administration, F. a. D. Regulatory considerations for human cells, tissues, and  
627 cellular and tissue - based products: Minimal manipulation and homologous use;  
628 guidance for industry and food and drug administration staff; availability. *Fed.*  
629 *Regist.* **82**, 54290-54292 (2017).
- 630 45 Fleming, P. A. *et al.* Fusion of uniluminal vascular spheroids: a model for assembly  
631 of blood vessels. *Dev. Dyn.* **239**, 398-406, doi:10.1002/dvdy.22161 (2010).
- 632 46 Mironov, V. *et al.* Organ printing: tissue spheroids as building blocks. *Biomaterials*  
633 **30**, 2164-2174, doi:10.1016/j.biomaterials.2008.12.084 (2009).
- 634 47 Huang, W. H. *et al.* Mesenchymal stem cells promote growth and angiogenesis of  
635 tumors in mice. *Oncogene* **32**, 4343-4354, doi:10.1038/onc.2012.458 (2013).
- 636 48 Iwase, T. *et al.* Comparison of angiogenic potency between mesenchymal stem  
637 cells and mononuclear cells in a rat model of hindlimb ischemia. *Cardiovasc. Res.*  
638 **66**, 543-551, doi:10.1016/j.cardiores.2005.02.006 (2005).
- 639 49 Davies, M. Critical limb ischemia: epidemiology. *Methodist Debaque Cardiovasc. J.*  
640 **8**, 10-14 (2012).
- 641 50 Tongers, J., Roncalli, J. G. & Losordo, D. W. Therapeutic angiogenesis for critical  
642 limb ischemia: microvascular therapies coming of age. *Circulation* **118**, 9-16,  
643 doi:10.1161/CIRCULATIONAHA.108.784371 (2008).
- 644 51 Raval, Z. & Losordo, D. W. Cell therapy of peripheral arterial disease: from  
645 experimental findings to clinical trials. *Circ. Res.* **112**, 1288-1302,  
646 doi:10.1161/CIRCRESAHA.113.300565 (2013).
- 647 52 Lawall, H., Bramlage, P. & Amann, B. Treatment of peripheral arterial disease using  
648 stem and progenitor cell therapy. *J. Vasc. Surg.* **53**, 445-453,  
649 doi:10.1016/j.jvs.2010.08.060 (2011).
- 650 53 Chen, L., Tredget, E. E., Wu, P. Y. & Wu, Y. Paracrine factors of mesenchymal stem  
651 cells recruit macrophages and endothelial lineage cells and enhance wound  
652 healing. *PLoS One* **3**, e1886, doi:10.1371/journal.pone.0001886 (2008).
- 653 54 Botham, C. M. B., W. L.; Cooke, J. P. Clinical trials of adult stem cell therapy for  
654 peripheral artery disease. *Methodist Debaque Cardiovasc. J.* **9** (2013).
- 655 55 Benoit, E., O'Donnell, T. F. & Patel, A. N. Safety and efficacy of autologous cell  
656 therapy in critical limb ischemia: a systematic review. *Cell Transplant.* **22**, 545-  
657 562, doi:10.3727/096368912X636777 (2013).

658 56 Laschke, M. W., Vollmar, B. & Menger, M. D. The dorsal skinfold chamber: window  
659 into the dynamic interaction of biomaterials with their surrounding host tissue.  
660 *European cells & materials* **22**, 147-164; discussion 164-147 (2011).  
661 57 Palmer, G. M., Fontanella, A. N., Shan, S. & Dewhirst, M. W. High-resolution in vivo  
662 imaging of fluorescent proteins using window chamber models. *Methods Mol. Biol.*  
663 **872**, 31-50, doi:10.1007/978-1-61779-797-2\_3 (2012).  
664  
665

666 FIGURES

667

668 Figure 1

669

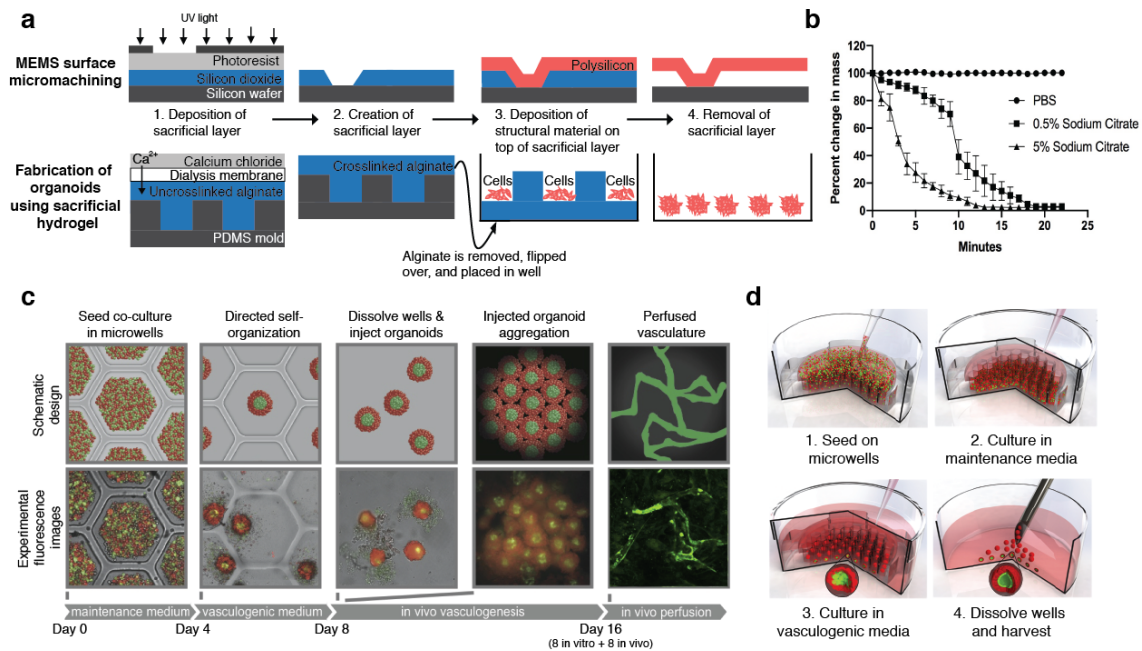

670

671 **Fig. 1. Schematic diagram of method of using sacrificial hydrogels to produce**

672 **therapeutic organoids. (A)** Schematic demonstrating the parallels between the surface

673 micromachining method to fabricate MEMS devices such as a microcantilever (top)

674 and the use of sacrificial alginate microwells to fabricate organoids (bottom). Both

675 methods involve the use of a sacrificial layer (blue) to fabricate the final structure (red).

676 **(B)** Time required to completely uncrosslink alginate microwells following incubation

677 with different concentrations of a chelator (sodium citrate) by measuring the percent

678 change in mass over time (n=3, Error bars are standard deviations). **(C)** Schematic

679 diagrams (top) and corresponding experimental images (bottom) showing the steps of

680 organoid fabrication and *in vivo* perfusion. Experimental data were collected using

681 GFP-labelled HUVECs and RFP-labelled mouse MSCs. First, a co-culture of

682 endothelial cells (green) and therapeutic cells (red) is seeded on dissolvable alginate

683 microwells. Second, after being cultured in maintenance medium without growth  
684 factors for 3 to 4 days, cells self-organize into organoids with an endothelial core. A  
685 switch into culture medium with vasculogenic growth factors for an additional 4 days  
686 promoted formation of vessels within the organoids. Third, alginate microwells were  
687 dissolved with 5% sodium citrate to release organoids. Fourth, suspension of organoids  
688 could be centrifuged and assembled into a macro-tissue *in vitro* to study vascular  
689 formation, or injected into the subdermis or ischemic hindlimb of a mouse to  
690 demonstrate engraftment *in vivo*. Fifth, injected organoids rapidly connected to form  
691 perfused microvasculature *in vivo*. **(D)** The liquid handling steps in the process: 1)  
692 seeding the co-culture of ECs (green) and MSCs (red) by pipetting cells onto alginate  
693 microwell construct, 2) adding maintenance media once the cells have settled to the  
694 bottom of the microwells (approx. 30 minutes), 3) switching to vasculogenic media  
695 once an endothelial core has formed, and 4) gently dissolving the alginate microwells  
696 (approx. 5 minutes) to harvest organoids (the organoids can be gently washed prior to  
697 injection).  
698  
699

700 **Figure 2**

701

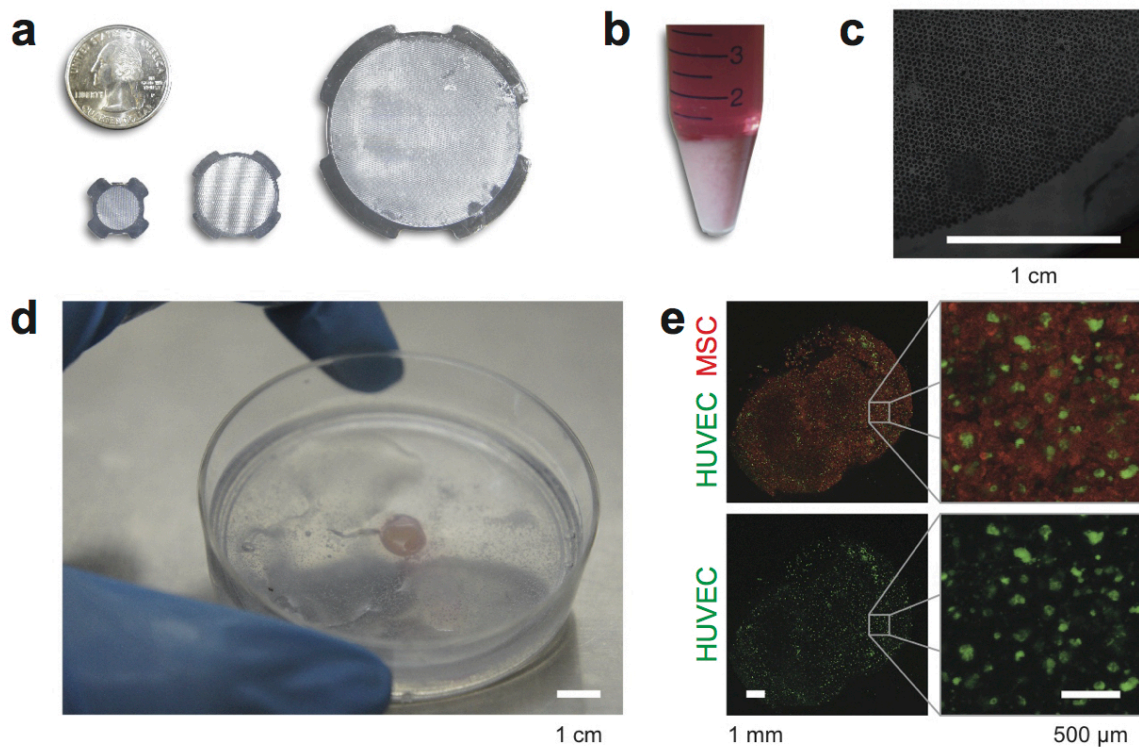

702

703 **Fig. 2. Production of organoids at large scale, and functionality of organoids to**

704 **form macrotissue. (A)** Pictures of three alginate microwells constructs for inserts into

705 24-well plates, 12-well plates or 60-mm dishes with the capacity to produce  $24 \times 1000$ ,

706  $12 \times 3000$  or 30,000 organoids respectively. **(B)** Picture of 250 million cells for

707 seeding into alginate microwells. Cells in this figure are GFP-labelled HUVECs and

708 RFP-labelled mouse MSCs. **(C)** Stitched brightfield image of cells seeded in a 60-mm

709 construct with 30,000 wells to create 30,000 organoids. Scale bar is 1 cm. **(D)** Picture

710 of a 1 mm thick macrotissues with an area of  $1 \text{ cm}^2$  assembled *in vitro* by collecting the

711 30,000 mature pre-vascularized organoids produced with the alginate microwell (a and

712 b) construct in a 60-mm dish. Scale bar is 1 cm. **(E)** Fluorescence images of the

713 macrotissue in (d) with a close-up of the closely packed organoids with endothelial

714 cores (green). Scale bars are 1 mm (left) and 500 µm (right).

715

716 **Figure 3**

717

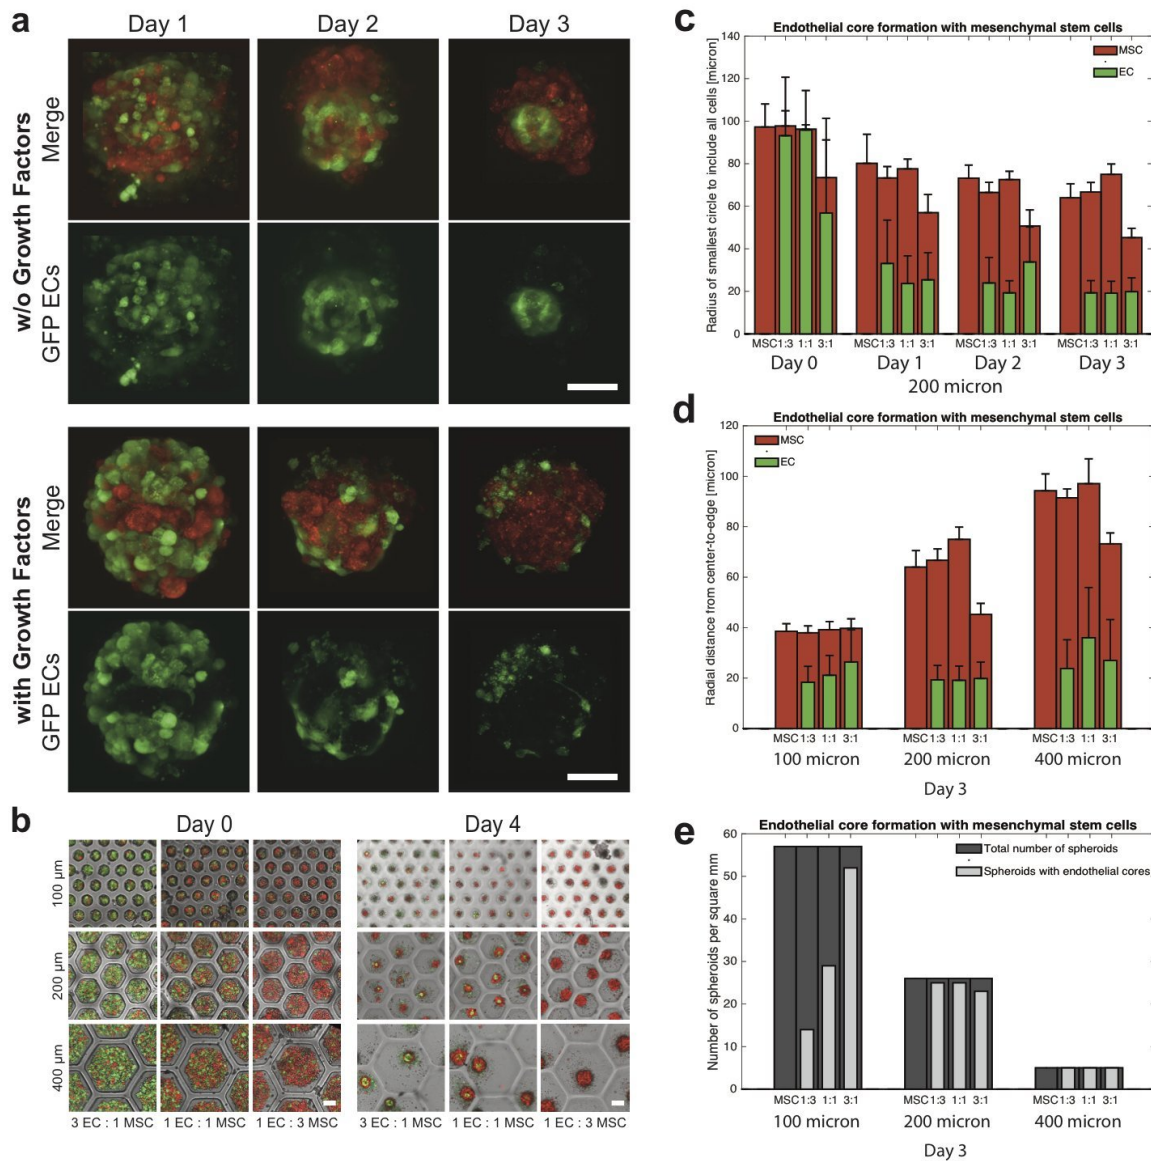

718

719 **Fig. 3. Production of vascularized organoids with high reproducibility in size and**

720 **structure. (A) Confocal fluorescence images of co-culture organoids of GFP-labeled**

721 **HUVECs (green) and RFP-labeled mouse MSCs (red) over the first three days in**

722 **maintenance medium without growth factors (top) or in vasculogenic medium with 40**

723 **ng/mL VEGF and 40 ng/mL bFGF (bottom). The cells self-organize by migration, and**

724 **either formed endothelial cores when cultured in media without growth factors (top) or**

725 **had endothelial cells randomly distributed near the surface of the organoid and did not**

726 form endothelial cores when cultured in media with growth factors (bottom). Scale  
727 bars are 100  $\mu\text{m}$ . **(B)** Overlay of fluorescent and transmitted images showing parallel  
728 production of organoids in arrays of different sizes of microwells (with either 100, 200,  
729 or 400  $\mu\text{m}$  diameter) and different co-culture ratios (1 EC : 3 MSC, 1 EC : 1 MSC or 3  
730 EC : 1 MSC). Different sizes of microwells yield different sizes of organoids, either  
731 unvascularized with only MSCs or pre-vascularized with a co-culture of ECs and  
732 MSCs, and different co-culture ratios yield different endothelial core sizes. Scale bars  
733 are 100  $\mu\text{m}$ . **(C)** Quantitative analysis of cell aggregation into organoids and the  
734 formation of an endothelial core over time in 200  $\mu\text{m}$  microwells, as measured by the  
735 radius of the smallest circle that can contain all MSCs (red) or all ECs (green) ( $n > 20$ ).  
736 **(D)** Barplot showing the size of fully-contracted organoids (red) and the size of the  
737 endothelial cores (green) for all tested microwell sizes and co-culture ratios. **(E)**  
738 Reproducibility of endothelial cores; the number of organoids produced in 1  $\text{mm}^2$  (dark  
739 grey) and the number of organoids containing and endothelial core (light grey) for all  
740 tested microwell sizes and co-culture ratios.  
741  
742

743 **Figure 4**

744

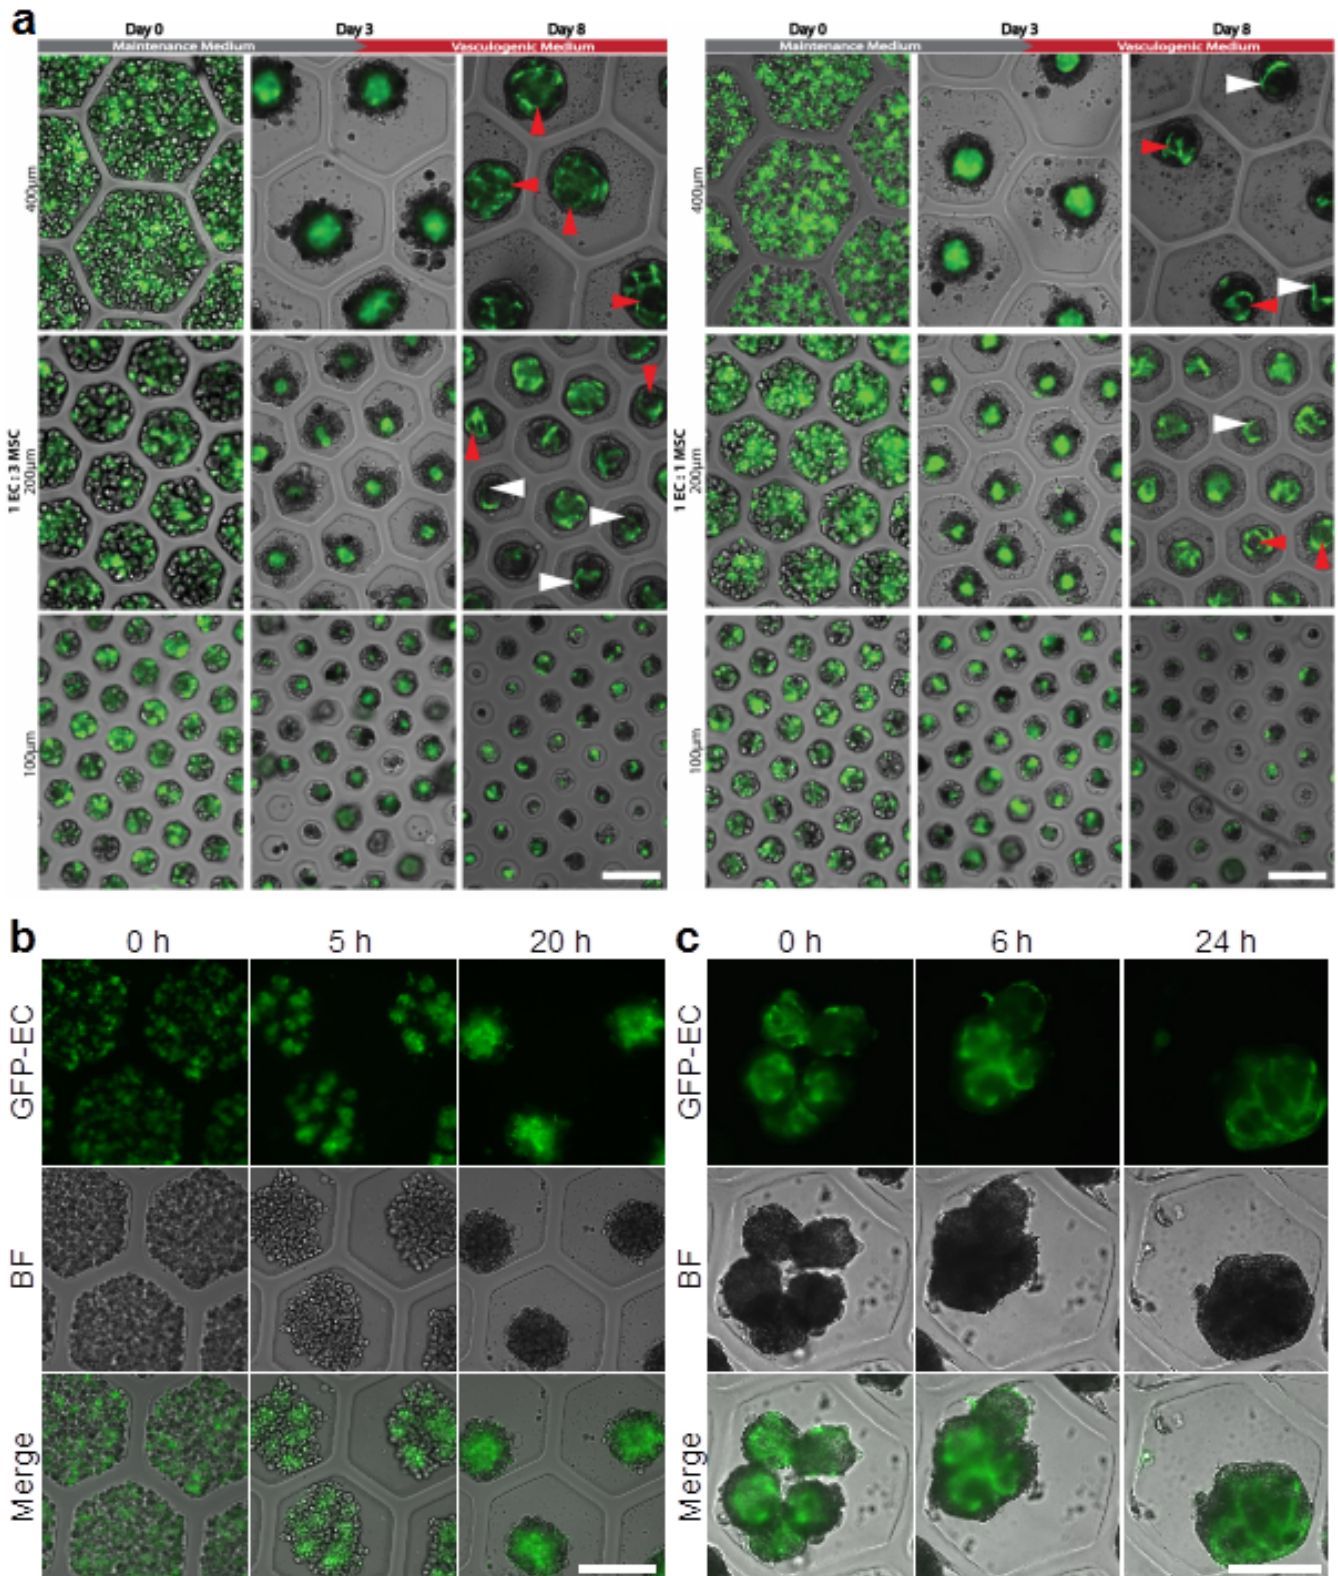

745

746



747 **Fig. 4. Production of vascularized organoids with human cells. (A)** Maturation of  
748 endothelial cores with dynamic culture conditions for two co-culture ratios; 1 GFP-  
749 HUVEC : 3 hAMSC (left) and 1 GFP-HUVEC : 1 hAMSC (right). The cells are seeded  
750 (day 0) and initially cultured in maintenance medium without growth factors to form  
751 endothelial cores. After 3 days the organoids were cultured in vasculogenic medium  
752 with 40 ng/mL VEGF and 40 ng/mL bFGF and the endothelial cores matured into  
753 vessels with discernable lumens (red arrows) and sprouts (white arrows). Scale bars are  
754 200  $\mu$ m. **(B)** Epifluorescence, brightfield, and overlay images showing early self-  
755 organization of pre-vascularized organoids over the first 20 hours, with a 1 GFP-  
756 HUVEC : 1 hAMSC co-culture in 400  $\mu$ m microwells. Scale bar is 200  $\mu$ m. **(C)**  
757 Epifluorescence, brightfield, and overlay images showing fusion of pre-vascularized  
758 organoids (same conditions as in right a and b) into mesotissues over the first 24 hours  
759 of the fusion process within a 400  $\mu$ m collagen-doped alginate microwell. Scale bar is  
760 200  $\mu$ m.  
761

762 **Figure 5**

763

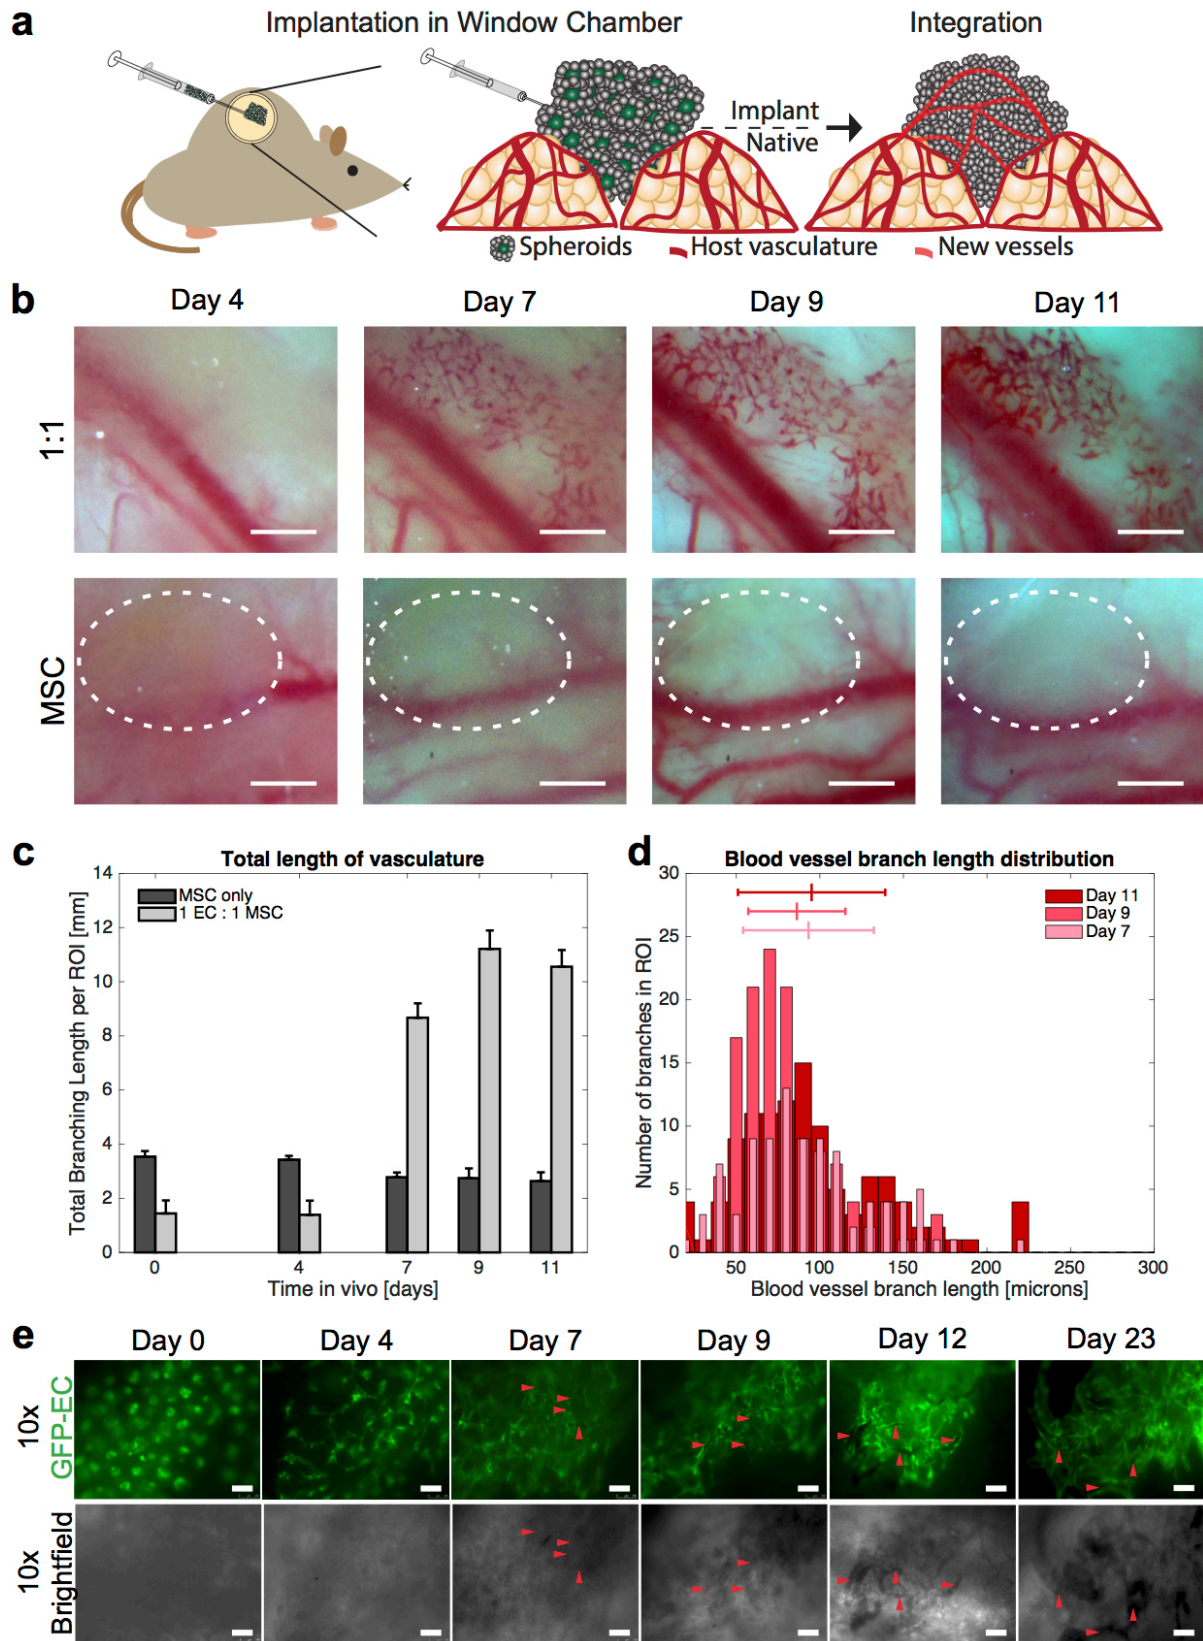

764

765 **Fig. 5. Rapid *in vivo* vascularization in healthy mice upon injection of organoids,**  
766 **as observed in real time via a window chamber. (A)** Schematic diagram of  
767 experimental setup for observing vascular formation and integration with host  
768 vasculature *in vivo* in real time via a window chamber. Organoids (from human cells  
769 formed under dynamic culture conditions in 200  $\mu\text{m}$  microwells yielding organoids  
770  $71 \pm 5 \mu\text{m}$  in diameter) were injected into a window chamber implant in a SCID mouse.  
771 **(B)** Real-time *in vivo* stereoscopic images of prevascularized microtissues with 1 GFP-  
772 HUVEC : 1 hAMSC (top row) and unvascularized organoids with hAMSC only  
773 (bottom row) through window chamber at different time points. Scale bars are 500  $\mu\text{m}$ .  
774 In the top row, newly formed vessels are apparent within 4 days, and blood-filled  
775 vessels observed by day 7. In the bottom row, the dashed white line indicates the area  
776 of organoids implant and no neo-vascularization was observed. **(C)** Quantification of  
777 neo-vascularization of the prevascularized organoids as the total length of vasculature  
778 within three ROI. The total length of vasculature increases substantially after day 7 for  
779 prevascularized organoids. There is no substantial difference in total length of the  
780 vasculature for the unvascularized organoids. **(D)** Histograms of branching length in  
781 the newly formed microvasculature (b and c) at day 7, 9 and 11. Lines above histogram  
782 indicate the mean branch length and standard deviation for day 7, day 9, and day 11 as  
783  $93 \pm 39 \mu\text{m}$ ,  $86 \pm 29 \mu\text{m}$ , and  $93 \pm 44 \mu\text{m}$  respectively. **(E)** Real-time *in vivo* images of  
784 prevascularized organoids with endothelial cells in green. Red arrow heads point to  
785 luminous, blood-filled vessels (as indicated by dark lines in fluorescence images and  
786 dark areas of brightfield images). Scale bar is 250  $\mu\text{m}$ .  
787  
788
